# Supplementary material for: Porous materials with pre-designed single-molecule traps for CO2 selective adsorption
Source: Springer Nature journal article supplement (doi:10.1038/ncomms2552), 2013-02-26
Supplement: 41467_2013_BFncomms2552_MOESM7_ESM.mol [file 41467_2013_BFncomms2552_MOESM7_ESM.mol]

  ChemDraw02071310512D

 34 37  0  0  0  0  0  0  0  0999 V2000
   -1.4289    1.6493    0.0000 C   0  0  0  0  0  0  0  0  0  0  0  0
   -1.4289    0.8243    0.0000 C   0  0  0  0  0  0  0  0  0  0  0  0
   -0.7145    0.4118    0.0000 N   0  0  0  0  0  0  0  0  0  0  0  0
    0.0000    0.8243    0.0000 C   0  0  0  0  0  0  0  0  0  0  0  0
    0.0000    1.6493    0.0000 C   0  0  0  0  0  0  0  0  0  0  0  0
   -0.7145    2.0618    0.0000 C   0  0  0  0  0  0  0  0  0  0  0  0
    0.7145    0.4118    0.0000 N   0  0  0  0  0  0  0  0  0  0  0  0
    1.4289    0.8243    0.0000 C   0  0  0  0  0  0  0  0  0  0  0  0
    1.4289    1.6493    0.0000 C   0  0  0  0  0  0  0  0  0  0  0  0
    0.7145    2.0618    0.0000 C   0  0  0  0  0  0  0  0  0  0  0  0
   -2.1434    0.4118    0.0000 C   0  0  0  0  0  0  0  0  0  0  0  0
    2.1434    0.4118    0.0000 C   0  0  0  0  0  0  0  0  0  0  0  0
   -2.8579    0.8243    0.0000 C   0  0  0  0  0  0  0  0  0  0  0  0
   -3.5724    0.4118    0.0000 C   0  0  0  0  0  0  0  0  0  0  0  0
   -3.5724   -0.4132    0.0000 C   0  0  0  0  0  0  0  0  0  0  0  0
   -2.8579   -0.8257    0.0000 C   0  0  0  0  0  0  0  0  0  0  0  0
   -2.1434   -0.4132    0.0000 C   0  0  0  0  0  0  0  0  0  0  0  0
    2.1434   -0.4132    0.0000 C   0  0  0  0  0  0  0  0  0  0  0  0
    2.8579   -0.8257    0.0000 C   0  0  0  0  0  0  0  0  0  0  0  0
    3.5724   -0.4132    0.0000 C   0  0  0  0  0  0  0  0  0  0  0  0
    3.5724    0.4118    0.0000 C   0  0  0  0  0  0  0  0  0  0  0  0
    2.8579    0.8243    0.0000 C   0  0  0  0  0  0  0  0  0  0  0  0
   -2.8579   -1.6507    0.0000 C   0  0  0  0  0  0  0  0  0  0  0  0
   -3.5699   -2.0618    0.0000 O   0  0  0  0  0  0  0  0  0  0  0  0
   -2.1459   -2.0618    0.0000 O   0  0  0  0  0  0  0  0  0  0  0  0
   -4.2843    0.8229    0.0000 C   0  0  0  0  0  0  0  0  0  0  0  0
   -4.9963    0.4118    0.0000 O   0  0  0  0  0  0  0  0  0  0  0  0
   -4.2843    1.6450    0.0000 O   0  0  0  0  0  0  0  0  0  0  0  0
    2.8579   -1.6507    0.0000 C   0  0  0  0  0  0  0  0  0  0  0  0
    2.1459   -2.0618    0.0000 O   0  0  0  0  0  0  0  0  0  0  0  0
    3.5699   -2.0618    0.0000 O   0  0  0  0  0  0  0  0  0  0  0  0
    4.2843    0.8229    0.0000 C   0  0  0  0  0  0  0  0  0  0  0  0
    4.2843    1.6450    0.0000 O   0  0  0  0  0  0  0  0  0  0  0  0
    4.9963    0.4118    0.0000 O   0  0  0  0  0  0  0  0  0  0  0  0
  1  2  2  0      
  2  3  1  0      
  3  4  2  0      
  4  5  1  0      
  5  6  2  0      
  6  1  1  0      
  4  7  1  0      
  7  8  2  0      
  8  9  1  0      
  9 10  2  0      
 10  5  1  0      
  2 11  1  0      
  8 12  1  0      
 11 13  2  0      
 13 14  1  0      
 14 15  2  0      
 15 16  1  0      
 16 17  2  0      
 17 11  1  0      
 12 18  2  0      
 18 19  1  0      
 19 20  2  0      
 20 21  1  0      
 21 22  2  0      
 22 12  1  0      
 16 23  1  0      
 19 29  1  0      
 14 26  1  0      
 21 32  1  0      
 23 24  2  0      
 23 25  1  0      
 26 27  2  0      
 26 28  1  0      
 29 30  2  0      
 29 31  1  0      
 32 33  2  0      
 32 34  1  0      
M  END
