# Supplementary material for: Porous materials with pre-designed single-molecule traps for CO2 selective adsorption
Source: Springer Nature journal article supplement (doi:10.1038/ncomms2552), 2013-02-26
Supplement: 41467_2013_BFncomms2552_MOESM13_ESM.mol [file 41467_2013_BFncomms2552_MOESM13_ESM.mol]

  ChemDraw02071310512D

116124  0  0  0  0  0  0  0  0999 V2000
    0.1357   -9.0670    0.0000 C   0  0  0  0  0  0  0  0  0  0  0  0
    0.3677   -8.2753    0.0000 C   0  0  0  0  0  0  0  0  0  0  0  0
   -0.2020   -7.6785    0.0000 N   0  0  0  0  0  0  0  0  0  0  0  0
   -1.0036   -7.8735    0.0000 C   0  0  0  0  0  0  0  0  0  0  0  0
   -1.2356   -8.6652    0.0000 C   0  0  0  0  0  0  0  0  0  0  0  0
   -0.6659   -9.2620    0.0000 C   0  0  0  0  0  0  0  0  0  0  0  0
   -1.5732   -7.2767    0.0000 N   0  0  0  0  0  0  0  0  0  0  0  0
   -2.3749   -7.4717    0.0000 C   0  0  0  0  0  0  0  0  0  0  0  0
   -2.6069   -8.2634    0.0000 C   0  0  0  0  0  0  0  0  0  0  0  0
   -2.0372   -8.8601    0.0000 C   0  0  0  0  0  0  0  0  0  0  0  0
    1.1693   -8.0803    0.0000 C   0  0  0  0  0  0  0  0  0  0  0  0
   -2.9445   -6.8749    0.0000 C   0  0  0  0  0  0  0  0  0  0  0  0
    1.7390   -8.6771    0.0000 C   0  0  0  0  0  0  0  0  0  0  0  0
    2.5406   -8.4822    0.0000 C   0  0  0  0  0  0  0  0  0  0  0  0
    2.7726   -7.6904    0.0000 C   0  0  0  0  0  0  0  0  0  0  0  0
    2.2030   -7.0937    0.0000 C   0  0  0  0  0  0  0  0  0  0  0  0
    1.4013   -7.2886    0.0000 C   0  0  0  0  0  0  0  0  0  0  0  0
   -2.7125   -6.0832    0.0000 C   0  0  0  0  0  0  0  0  0  0  0  0
   -3.2822   -5.4864    0.0000 C   0  0  0  0  0  0  0  0  0  0  0  0
   -4.0838   -5.6814    0.0000 C   0  0  0  0  0  0  0  0  0  0  0  0
   -4.3158   -6.4731    0.0000 C   0  0  0  0  0  0  0  0  0  0  0  0
   -3.7462   -7.0699    0.0000 C   0  0  0  0  0  0  0  0  0  0  0  0
    2.4349   -6.3020    0.0000 C   0  0  0  0  0  0  0  0  0  0  0  0
    3.2338   -6.1077    0.0000 O   0  0  0  0  0  0  0  0  0  0  0  0
    1.8673   -5.7073    0.0000 O   0  5  0  0  0  0  0  0  0  0  0  0
   -3.0502   -4.6947    0.0000 C   0  0  0  0  0  0  0  0  0  0  0  0
   -3.6179   -4.1000    0.0000 O   0  0  0  0  0  0  0  0  0  0  0  0
   -2.2514   -4.5005    0.0000 O   0  5  0  0  0  0  0  0  0  0  0  0
   -0.3051   -4.7871    0.0000 Mo  0  2  0  0  0  0  0  0  0  0  0  0
   -6.7202   -0.4133    0.0000 C   0  0  0  0  0  0  0  0  0  0  0  0
   -5.8953   -0.4027    0.0000 C   0  0  0  0  0  0  0  0  0  0  0  0
   -5.4920    0.3170    0.0000 N   0  0  0  0  0  0  0  0  0  0  0  0
   -5.9137    1.0261    0.0000 C   0  0  0  0  0  0  0  0  0  0  0  0
   -6.7386    1.0155    0.0000 C   0  0  0  0  0  0  0  0  0  0  0  0
   -7.1419    0.2958    0.0000 C   0  0  0  0  0  0  0  0  0  0  0  0
   -5.5104    1.7459    0.0000 N   0  0  0  0  0  0  0  0  0  0  0  0
   -5.9321    2.4550    0.0000 C   0  0  0  0  0  0  0  0  0  0  0  0
   -6.7570    2.4444    0.0000 C   0  0  0  0  0  0  0  0  0  0  0  0
   -7.1603    1.7246    0.0000 C   0  0  0  0  0  0  0  0  0  0  0  0
   -5.4736   -1.1118    0.0000 C   0  0  0  0  0  0  0  0  0  0  0  0
   -5.5288    3.1747    0.0000 C   0  0  0  0  0  0  0  0  0  0  0  0
   -5.8769   -1.8315    0.0000 C   0  0  0  0  0  0  0  0  0  0  0  0
   -5.4553   -2.5406    0.0000 C   0  0  0  0  0  0  0  0  0  0  0  0
   -4.6303   -2.5300    0.0000 C   0  0  0  0  0  0  0  0  0  0  0  0
   -4.2270   -1.8103    0.0000 C   0  0  0  0  0  0  0  0  0  0  0  0
   -4.6487   -1.1012    0.0000 C   0  0  0  0  0  0  0  0  0  0  0  0
   -4.7038    3.1853    0.0000 C   0  0  0  0  0  0  0  0  0  0  0  0
   -4.3006    3.9050    0.0000 C   0  0  0  0  0  0  0  0  0  0  0  0
   -4.7222    4.6141    0.0000 C   0  0  0  0  0  0  0  0  0  0  0  0
   -5.5472    4.6035    0.0000 C   0  0  0  0  0  0  0  0  0  0  0  0
   -5.9504    3.8838    0.0000 C   0  0  0  0  0  0  0  0  0  0  0  0
   -3.4021   -1.7997    0.0000 C   0  0  0  0  0  0  0  0  0  0  0  0
   -2.9819   -2.5063    0.0000 O   0  0  0  0  0  0  0  0  0  0  0  0
   -3.0002   -1.0824    0.0000 O   0  5  0  0  0  0  0  0  0  0  0  0
   -3.4756    3.9156    0.0000 C   0  0  0  0  0  0  0  0  0  0  0  0
   -3.0738    4.6329    0.0000 O   0  0  0  0  0  0  0  0  0  0  0  0
   -3.0554    3.2090    0.0000 O   0  5  0  0  0  0  0  0  0  0  0  0
   -0.1762   -3.2830    0.0000 Mo  0  2  0  0  0  0  0  0  0  0  0  0
    6.7202    0.2663    0.0000 C   0  0  0  0  0  0  0  0  0  0  0  0
    5.8953    0.2557    0.0000 C   0  0  0  0  0  0  0  0  0  0  0  0
    5.4920   -0.4640    0.0000 N   0  0  0  0  0  0  0  0  0  0  0  0
    5.9137   -1.1731    0.0000 C   0  0  0  0  0  0  0  0  0  0  0  0
    6.7386   -1.1625    0.0000 C   0  0  0  0  0  0  0  0  0  0  0  0
    7.1419   -0.4428    0.0000 C   0  0  0  0  0  0  0  0  0  0  0  0
    5.5104   -1.8929    0.0000 N   0  0  0  0  0  0  0  0  0  0  0  0
    5.9321   -2.6020    0.0000 C   0  0  0  0  0  0  0  0  0  0  0  0
    6.7570   -2.5913    0.0000 C   0  0  0  0  0  0  0  0  0  0  0  0
    7.1603   -1.8716    0.0000 C   0  0  0  0  0  0  0  0  0  0  0  0
    5.4736    0.9648    0.0000 C   0  0  0  0  0  0  0  0  0  0  0  0
    5.5288   -3.3217    0.0000 C   0  0  0  0  0  0  0  0  0  0  0  0
    5.8769    1.6845    0.0000 C   0  0  0  0  0  0  0  0  0  0  0  0
    5.4553    2.3936    0.0000 C   0  0  0  0  0  0  0  0  0  0  0  0
    4.6303    2.3830    0.0000 C   0  0  0  0  0  0  0  0  0  0  0  0
    4.2270    1.6633    0.0000 C   0  0  0  0  0  0  0  0  0  0  0  0
    4.6487    0.9542    0.0000 C   0  0  0  0  0  0  0  0  0  0  0  0
    4.7038   -3.3323    0.0000 C   0  0  0  0  0  0  0  0  0  0  0  0
    4.3006   -4.0520    0.0000 C   0  0  0  0  0  0  0  0  0  0  0  0
    4.7222   -4.7611    0.0000 C   0  0  0  0  0  0  0  0  0  0  0  0
    5.5472   -4.7505    0.0000 C   0  0  0  0  0  0  0  0  0  0  0  0
    5.9504   -4.0308    0.0000 C   0  0  0  0  0  0  0  0  0  0  0  0
    3.4021    1.6527    0.0000 C   0  0  0  0  0  0  0  0  0  0  0  0
    2.9819    2.3593    0.0000 O   0  0  0  0  0  0  0  0  0  0  0  0
    3.0002    0.9355    0.0000 O   0  5  0  0  0  0  0  0  0  0  0  0
    3.4756   -4.0626    0.0000 C   0  0  0  0  0  0  0  0  0  0  0  0
    3.0738   -4.7798    0.0000 O   0  0  0  0  0  0  0  0  0  0  0  0
    3.0554   -3.3560    0.0000 O   0  5  0  0  0  0  0  0  0  0  0  0
    3.4146    8.1617    0.0000 C   0  0  0  0  0  0  0  0  0  0  0  0
    3.1409    7.3834    0.0000 C   0  0  0  0  0  0  0  0  0  0  0  0
    2.3300    7.2313    0.0000 N   0  0  0  0  0  0  0  0  0  0  0  0
    1.7929    7.8575    0.0000 C   0  0  0  0  0  0  0  0  0  0  0  0
    2.0666    8.6358    0.0000 C   0  0  0  0  0  0  0  0  0  0  0  0
    2.8774    8.7879    0.0000 C   0  0  0  0  0  0  0  0  0  0  0  0
    0.9820    7.7054    0.0000 N   0  0  0  0  0  0  0  0  0  0  0  0
    0.4449    8.3316    0.0000 C   0  0  0  0  0  0  0  0  0  0  0  0
    0.7186    9.1099    0.0000 C   0  0  0  0  0  0  0  0  0  0  0  0
    1.5294    9.2620    0.0000 C   0  0  0  0  0  0  0  0  0  0  0  0
    3.6780    6.7573    0.0000 C   0  0  0  0  0  0  0  0  0  0  0  0
   -0.3660    8.1795    0.0000 C   0  0  0  0  0  0  0  0  0  0  0  0
    4.4889    6.9094    0.0000 C   0  0  0  0  0  0  0  0  0  0  0  0
    5.0260    6.2832    0.0000 C   0  0  0  0  0  0  0  0  0  0  0  0
    4.7523    5.5049    0.0000 C   0  0  0  0  0  0  0  0  0  0  0  0
    3.9415    5.3528    0.0000 C   0  0  0  0  0  0  0  0  0  0  0  0
    3.4043    5.9790    0.0000 C   0  0  0  0  0  0  0  0  0  0  0  0
   -0.6397    7.4012    0.0000 C   0  0  0  0  0  0  0  0  0  0  0  0
   -1.4506    7.2491    0.0000 C   0  0  0  0  0  0  0  0  0  0  0  0
   -1.9877    7.8753    0.0000 C   0  0  0  0  0  0  0  0  0  0  0  0
   -1.7140    8.6535    0.0000 C   0  0  0  0  0  0  0  0  0  0  0  0
   -0.9032    8.8057    0.0000 C   0  0  0  0  0  0  0  0  0  0  0  0
    3.6678    4.5745    0.0000 C   0  0  0  0  0  0  0  0  0  0  0  0
    4.2031    3.9506    0.0000 O   0  0  0  0  0  0  0  0  0  0  0  0
    2.8597    4.4230    0.0000 O   0  5  0  0  0  0  0  0  0  0  0  0
   -1.7243    6.4708    0.0000 C   0  0  0  0  0  0  0  0  0  0  0  0
   -2.5323    6.3193    0.0000 O   0  0  0  0  0  0  0  0  0  0  0  0
   -1.1890    5.8468    0.0000 O   0  5  0  0  0  0  0  0  0  0  0  0
    0.6403    4.4952    0.0000 Mo  0  2  0  0  0  0  0  0  0  0  0  0
    0.0387    2.9911    0.0000 Mo  0  2  0  0  0  0  0  0  0  0  0  0
  1  2  2  0      
  2  3  1  0      
  3  4  2  0      
  4  5  1  0      
  5  6  2  0      
  6  1  1  0      
  4  7  1  0      
  7  8  2  0      
  8  9  1  0      
  9 10  2  0      
 10  5  1  0      
  2 11  1  0      
  8 12  1  0      
 11 13  2  0      
 13 14  1  0      
 14 15  2  0      
 15 16  1  0      
 16 17  2  0      
 17 11  1  0      
 12 18  2  0      
 18 19  1  0      
 19 20  2  0      
 20 21  1  0      
 21 22  2  0      
 22 12  1  0      
 16 23  1  0      
 19 26  1  0      
 23 24  2  0      
 23 25  1  0      
 26 27  2  0      
 26 28  1  0      
 30 31  2  0      
 31 32  1  0      
 32 33  2  0      
 33 34  1  0      
 34 35  2  0      
 35 30  1  0      
 33 36  1  0      
 36 37  2  0      
 37 38  1  0      
 38 39  2  0      
 39 34  1  0      
 31 40  1  0      
 37 41  1  0      
 40 42  2  0      
 42 43  1  0      
 43 44  2  0      
 44 45  1  0      
 45 46  2  0      
 46 40  1  0      
 41 47  2  0      
 47 48  1  0      
 48 49  2  0      
 49 50  1  0      
 50 51  2  0      
 51 41  1  0      
 45 52  1  0      
 48 55  1  0      
 52 53  2  0      
 52 54  1  0      
 55 56  2  0      
 55 57  1  0      
 59 60  2  0      
 60 61  1  0      
 61 62  2  0      
 62 63  1  0      
 63 64  2  0      
 64 59  1  0      
 62 65  1  0      
 65 66  2  0      
 66 67  1  0      
 67 68  2  0      
 68 63  1  0      
 60 69  1  0      
 66 70  1  0      
 69 71  2  0      
 71 72  1  0      
 72 73  2  0      
 73 74  1  0      
 74 75  2  0      
 75 69  1  0      
 70 76  2  0      
 76 77  1  0      
 77 78  2  0      
 78 79  1  0      
 79 80  2  0      
 80 70  1  0      
 74 81  1  0      
 77 84  1  0      
 81 82  2  0      
 81 83  1  0      
 84 85  2  0      
 84 86  1  0      
 87 88  2  0      
 88 89  1  0      
 89 90  2  0      
 90 91  1  0      
 91 92  2  0      
 92 87  1  0      
 90 93  1  0      
 93 94  2  0      
 94 95  1  0      
 95 96  2  0      
 96 91  1  0      
 88 97  1  0      
 94 98  1  0      
 97 99  2  0      
 99100  1  0      
100101  2  0      
101102  1  0      
102103  2  0      
103 97  1  0      
 98104  2  0      
104105  1  0      
105106  2  0      
106107  1  0      
107108  2  0      
108 98  1  0      
102109  1  0      
105112  1  0      
109110  2  0      
109111  1  0      
112113  2  0      
112114  1  0      
M  CHG  8  25  -1  28  -1  29   2  54  -1  57  -1  58   2  83  -1  86  -1
M  CHG  4 111  -1 114  -1 115   2 116   2
M  END
